# Supplementary material
Source: PubMed Central journal article supplement (PMC6338514)
Supplement: NIHMS1509214-supplement-1.pdf [file NIHMS1509214-supplement-1.pdf]

## SUPPLEMENTARY INFORMATION

**Table S1. Related to Table 1. Inhibition of *C. scindens* and *Staph. aureus* by clinical strains of *C. difficile***

| Clinical<br><i>C. difficile</i><br>(ATCC Number) | Inhibitory test                                                 |                                               | Toxinotype   | Binary<br>Toxin | Ribotype | Isolation source               |
|--------------------------------------------------|-----------------------------------------------------------------|-----------------------------------------------|--------------|-----------------|----------|--------------------------------|
|                                                  | <i>C. scindens</i><br>ATCC 35704<br>(0.75 O.D/PYF) <sup>†</sup> | <i>Staph. aureus</i><br>MRSA<br>(1.2 O.D/PYF) |              |                 |          |                                |
| ATCC 9689                                        | 0.08±0.04‡*                                                     | 0.23±0.15*                                    | 0            | ND              | 001      | clinical isolate (Type strain) |
| BAA-1870                                         | 0.04±0.01*                                                      | 0.06±0.02*                                    | IIIb         | Yes             | 027      | clinical isolate (ME, US)      |
| BAA-1801                                         | 0.10±0.02*                                                      | 0.54±0.11*                                    | tcdA-, tcdB- | ND              | 010      | human Feces (Belgium)          |
| BAA-1814                                         | 0.04±0.01*                                                      | 0.04±0.01*                                    | XXII         | Yes             | 251      | clinical Isolate (unknown)     |

†:O.D at fresh PYF broth as control, ‡: Average±SD. \*: Significant growth inhibition, p<0.05

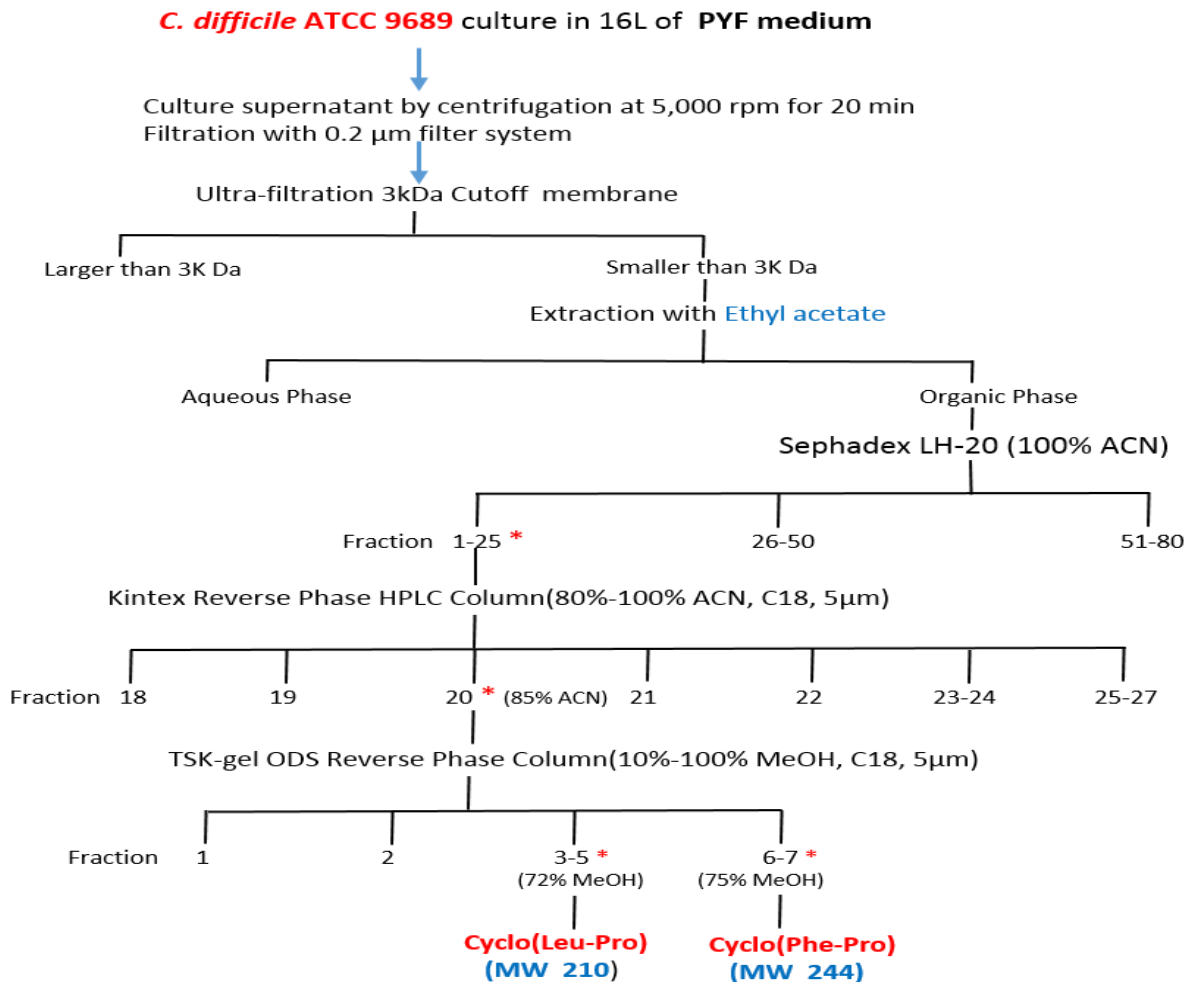

**Figure S1. Related to Figure 2. Purification protocol for isolating antibacterial compounds secreted by *Clostridium difficile* ATCC 9689.** The purification protocol started with 16 liters of spent PYF culture medium (24 hours incubation) of *C. difficile* ATCC 9689. The medium was initially filter sterilized using a 0.2 micron filter, followed by ultrafiltration through a 3 kDa filter. The filter sterilized and size fractionated supernatant fluid was extracted with ethyl acetate, followed by Sephadex LH 20 column chromatography using 100% ACN solvent, followed by two sequential C-18 reverse-phase HPLC solvent systems. Each fraction was analyzed for antibacterial activity by measuring inhibition of the growth of *Clostridium scindens* ATCC 35704 in PYF medium. Purified fractions (3 to 5 and 6 and 7) from the final HPLC step, with antibacterial activity, were then submitted for LC-ESI/MS and  $^1\text{H}$  and  $^{13}\text{C}$  NMR analysis (STAR Methods).

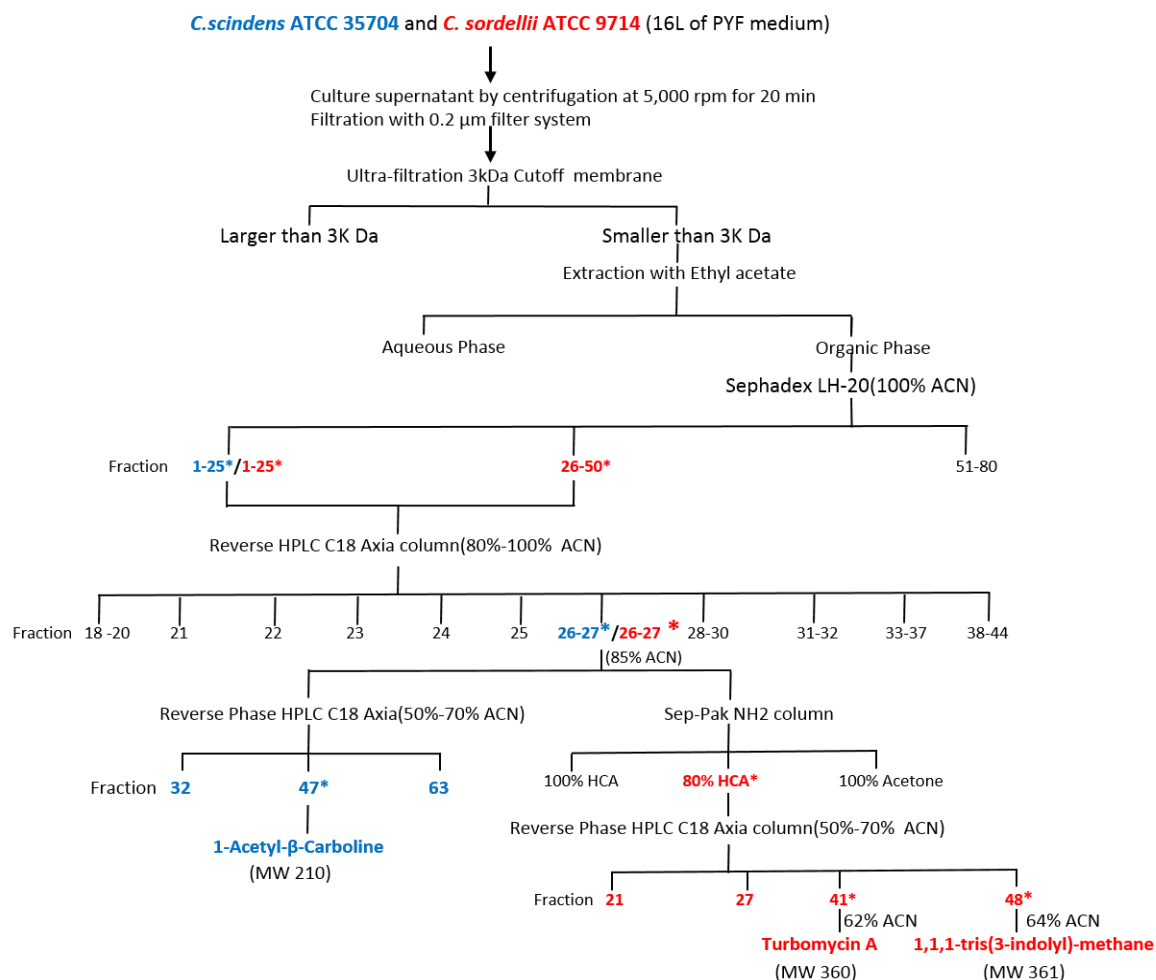

**Figure S2. Related to Figure 3. Purification of antibacterial compounds secreted by *Clostridium scindens* (blue) and *Clostridium sordellii* (red).** Purification of compounds from each bacterium started with 16 liters of spent PYF culture medium (24 hrs.). The purification began with filter sterilization through a 0.2μ filter followed by a 3 kDa filter. The compound(s) were then extracted into ethyl acetate followed by Sephadex LH-20 column chromatography using 100% ACN solvent. A series of C-18 reverse phase HPLC solvent systems were used to purify each compound until a single symmetrical peak was obtained. Each fraction was assayed for antibacterial activity using *Clostridium difficile* ATCC 9689 as test bacterium. The pure compounds were then sent for LC-ESI/MS and <sup>1</sup>H and <sup>13</sup>C NMR analysis (STAR Methods).

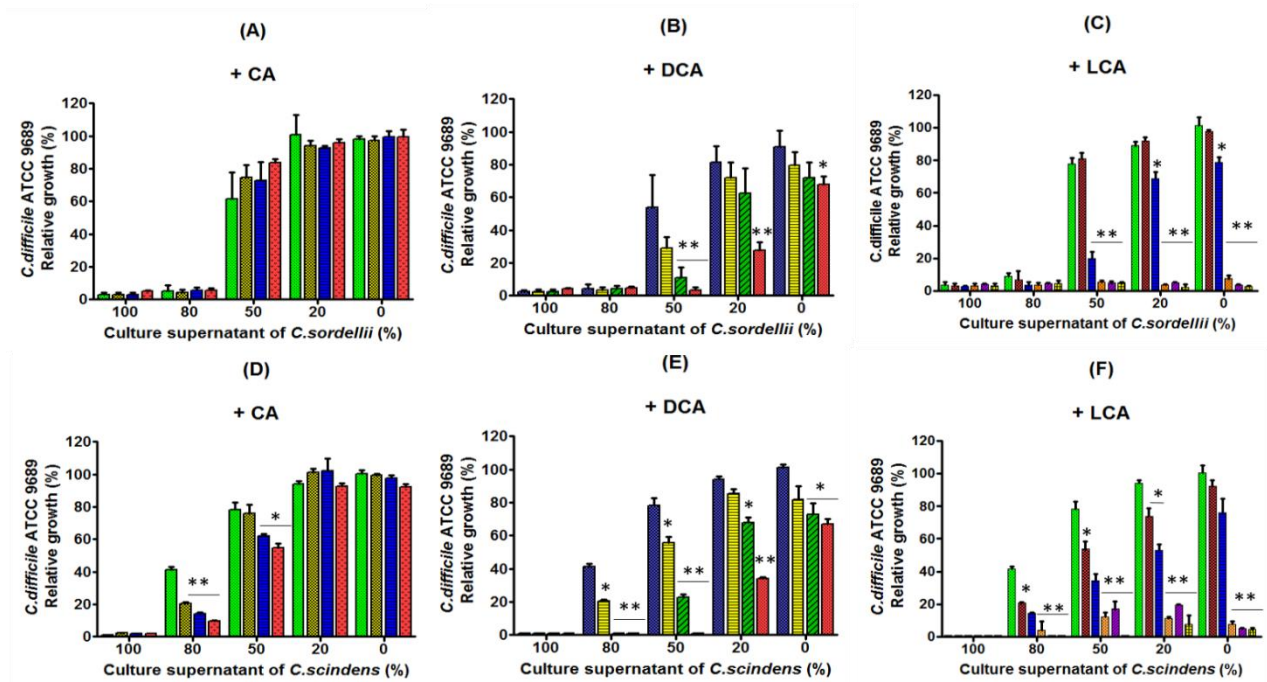

**Figure S3. Related to Figures 4 and 5. Effect of bile acid addition to spent culture medium of *C. sordellii* and *C. scindens* on growth of *C. difficile*.** Spent culture PYF medium (24 hrs.) from either *C. sordellii* or *C. scindens* was filter sterilized, pH adjusted to 7,2, diluted with increasing amounts of fresh PYF medium until growth was approximately 40% to 60% maximal. Varying concentrations of either cholic acid (CA), ■ No CA, ■ 25uM CA, ■ 50uM CA, ■ 100uM CA or deoxycholic acid (DCA), ■ No DCA, ■ 25uM DCA, ■ 50uM DCA, ■ 100uM DCA or lithocholic acid, ■ No LCA, ■ 1.25uM LCA, ■ 5.0uM LCA, ■ 12.5uM LCA, ■ 25uM LCA, ■ 50uM LCA was added to diluted spent culture media,

inoculated with  $10^6$ /ml vegetative cells of *C. difficile*, incubated for 24 hrs, and OD readings measured at 660 nm. \* $p < 0.05$ , \*\*  $p < 0.01$ .

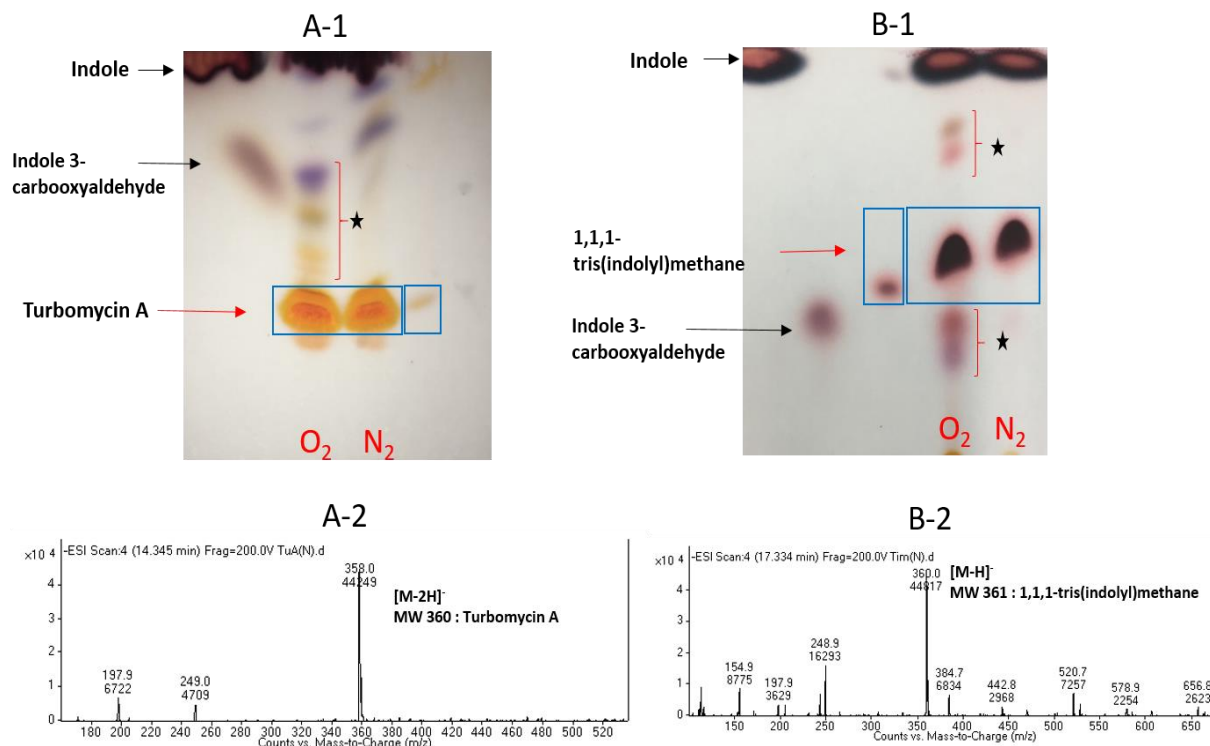

**Figure S4. Related to Figures 4 and 5. Chemical synthesis turbomycin A and of 1,1,1-tris(3-indolyl)-methane (TIM) under aerobic ( $O_2$ ) vs anaerobic ( $N_2$ ) conditions. (See STAR Methods). The reactants (indole and indole 3-carboxyaldehyde) and product (turbomycin A) was separated on TLC using a solvent system of (chloroform:methanol:toluene, 80:20:2, vol/vol/vol) left panel (A-1). The reactant substrates and product (1,1,1-tris-(3-indolyl)-methane, TIM) was separated on TLC using a solvent system of (chloroform:hexane:acetone, 60:20:10, vol/vol/vol) and products shown on the right panel (B-1). The substrates and products for each reaction were detected using a mixture of van Urk and Salkowski (1:3, vol/vol) reagent (Ehmann, 1977). \*Unknown oxidized/degradation products. Product identification of purified chemically synthesized turbomycin A and TIM were determined by mass spectrometry (A-2) and TIM (B-2).**

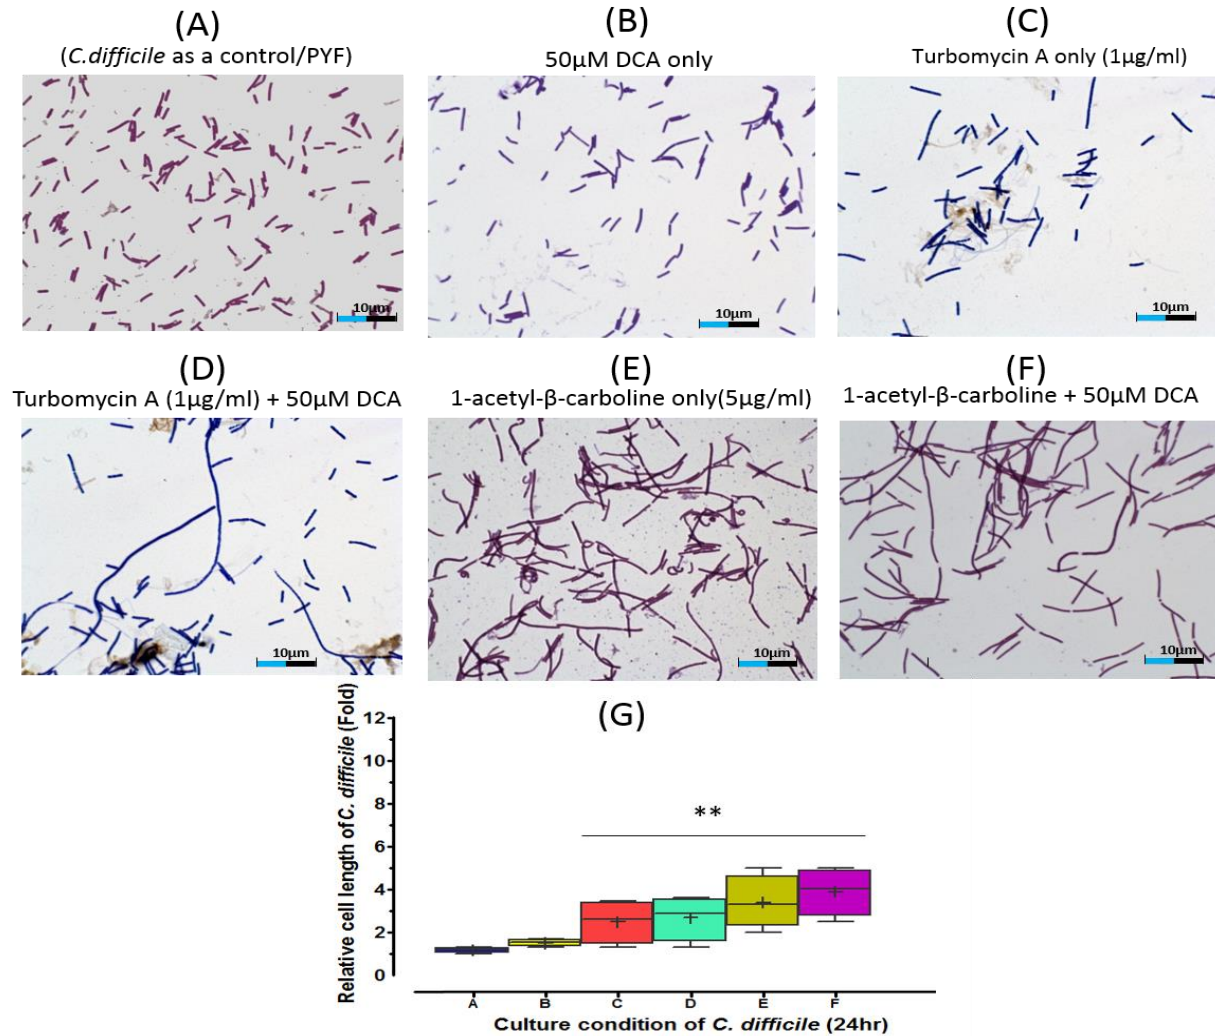

**Figure S5. Related to Figure 6. Changes in *C. difficile* ATCC 9689 cell morphology induced by turbomycin A and 1-acetyl-β-carboline with and without deoxycholic acid (A-F).** Vegetative cells  $10^6$  were inoculated into PYF medium containing: A) no additions; B) DCA (50 μM); C) turbomycin A (1 μg/ml); D) turbomycin A (1 μg/ml) + DCA (50 μM); E) 1-acetyl-β-carboline (5 μg/ml) and F) 1-acetyl-β-carboline (5 μg/ml) + DCA (50 μM) and incubated for 24 hrs. Each culture (1ml) was concentrated to 100 μl by centrifugation, 5 μl of cell suspension loaded on to a slide for Gram staining and photo images taken (Methods). Cell length was determined by using indicated size bar in several microscopic fields. (Magnification 1000x). \*\* P<0.01
